# Supplementary material for: Highly luminescent, off-stoichiometric CuxInyS2/ZnS quantum dots for near-infrared fluorescence bio-imaging
Source: Royal Society of Chemistry journal article supplement (doi:10.1039/c5ra06912b), 2015-01-01
Supplement: c5ra06912b1.pdf [file c5ra06912b1.pdf]

## Supporting Information

---

### **Highly Luminescent, Off-stoichiometric $\text{Cu}_x\text{In}_y\text{S}_2/\text{ZnS}$ Quantum Dots for Near-infrared Fluorescence Bio-imaging**

**Hyung Seok Choi, Youngsun Kim, Jae Chul Park,  
Mi Hwa Oh, Duk Young Jeon, and Yoon Sung Nam**

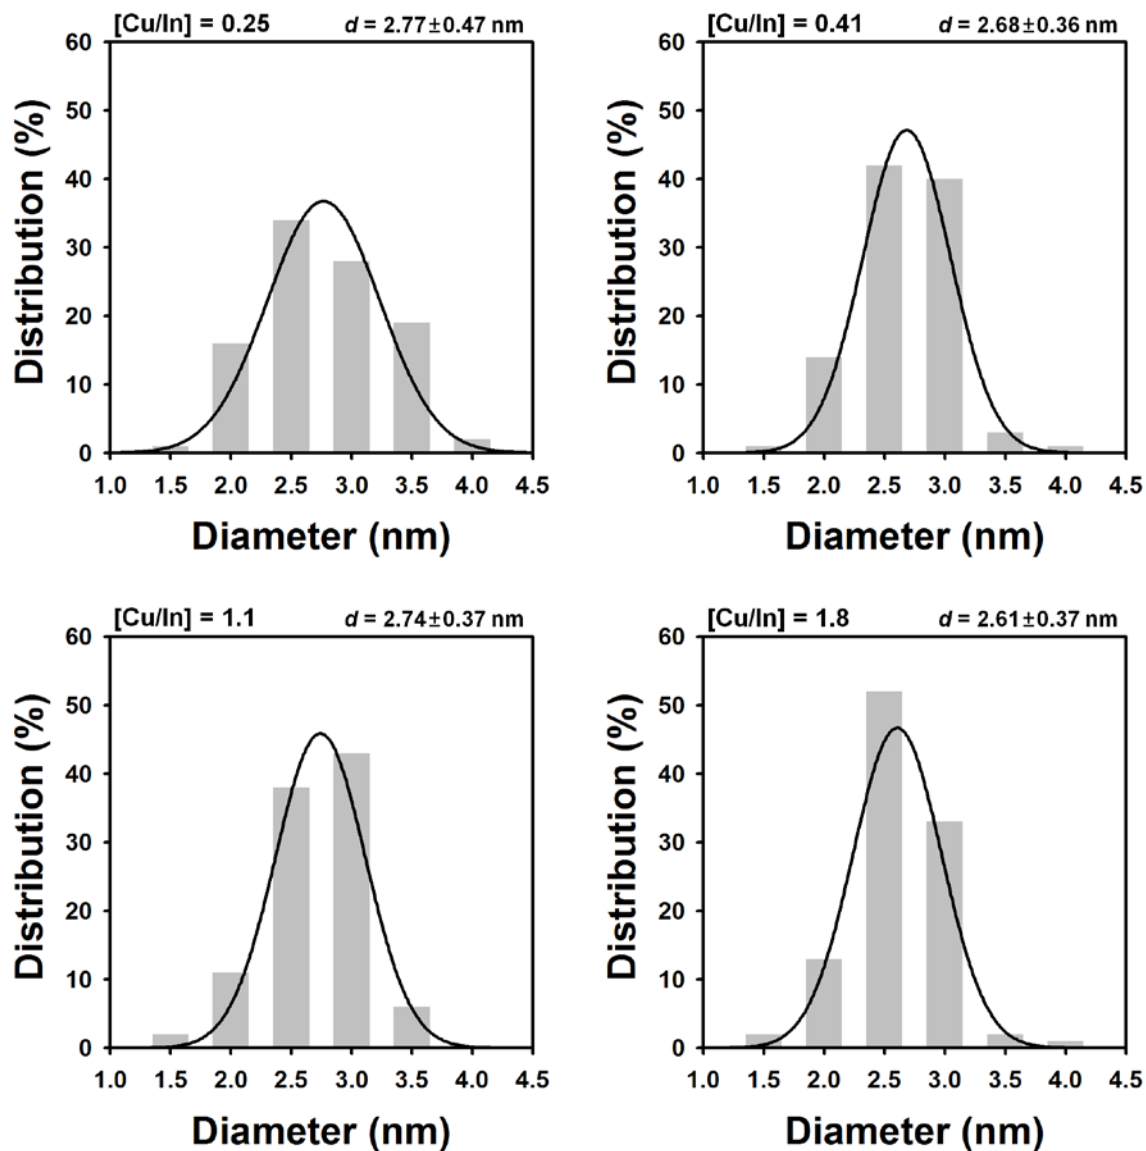

**Figure S1.** Size distribution histograms of the CIS QDs synthesized with different compositions.

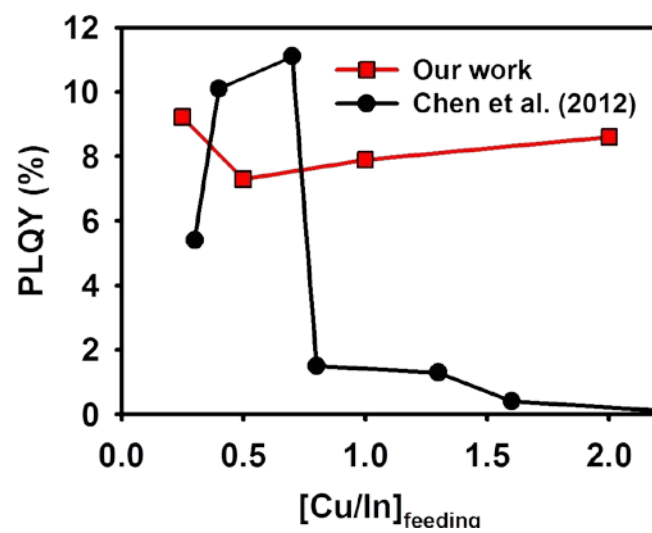

**Figure S2.** Comparison of **changes in the** PLQY of the CIS QDs as a function of Cu/In ratios: a previous work [23] (black) and our current results (red).

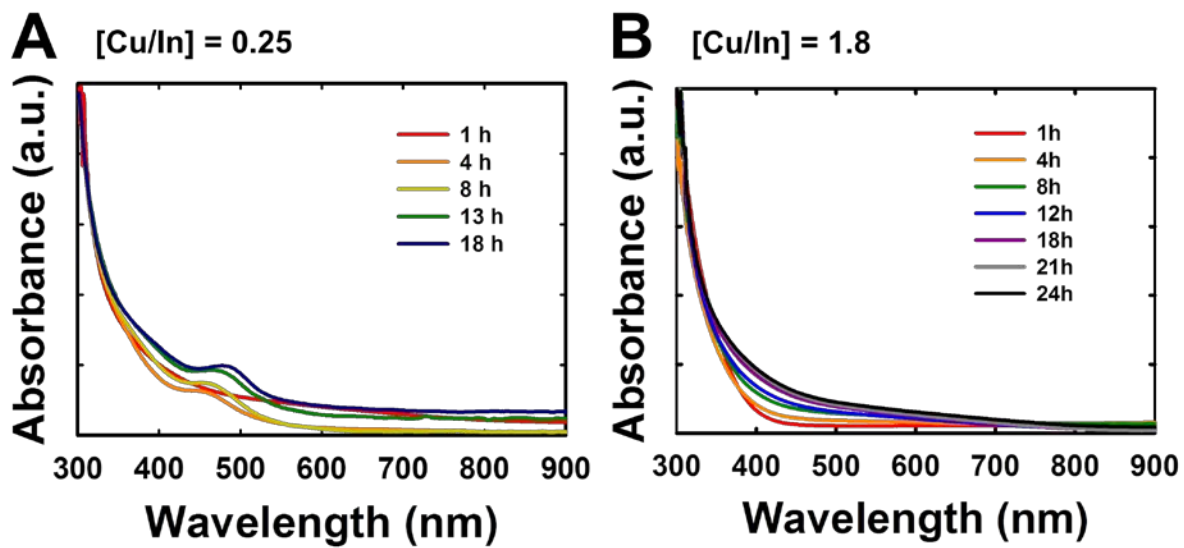

**Figure S3.** The original curve of variation of the absorption spectra of the CIS QDs as a function of synthesis time with Cu/In ratios of 0.25 (A) and 1.8 (B) at 180 °C.

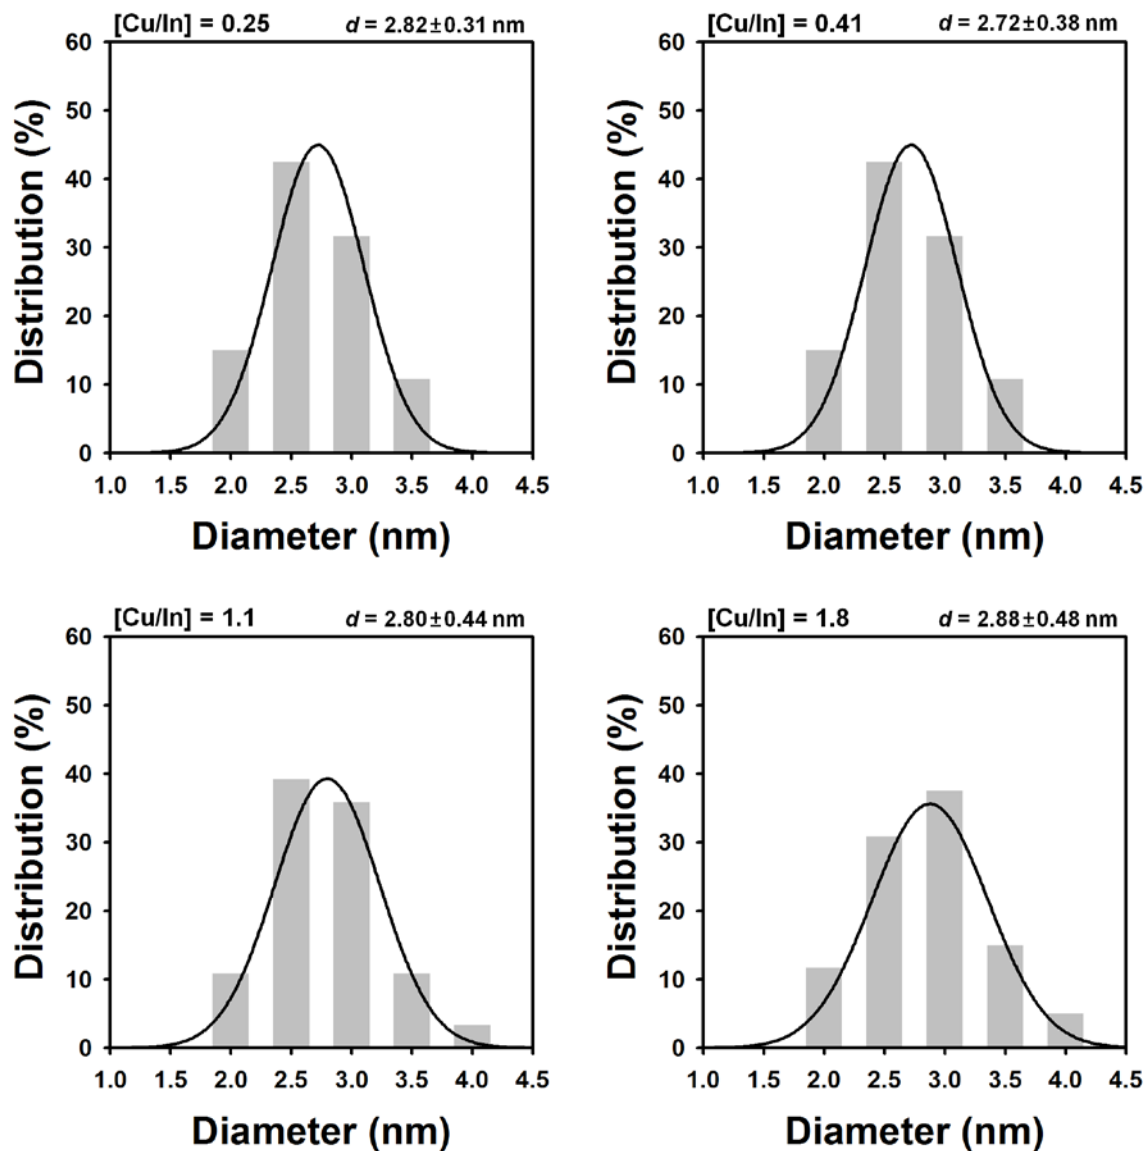

**Figure S4.** Size distribution histograms of the CIS/ZnS QDs synthesized with different compositions.

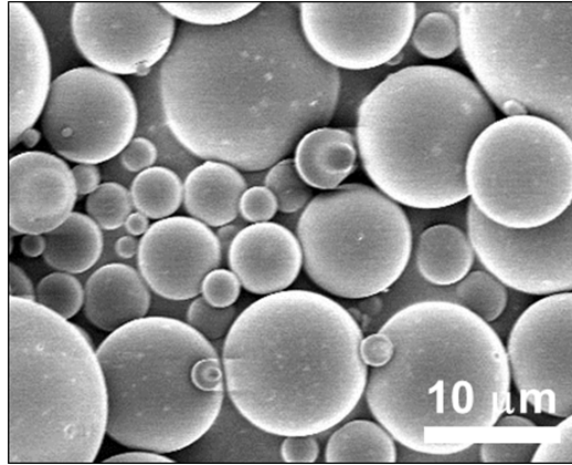

**Figure S5.** SEM image of the QD-loaded PMMA microspheres . QD-PMMA microspheres were implanted under thigh muscle by intramuscular injection.
